# Supplementary material for: Extractivism and Unjust Food Insecurity for Peru’s Loreto Indigenous Communities
Source: MDPI journal article supplement (doi:10.3390/su14126954), 2022-06-07
Supplement: s1 [file s1]

## Article

# Extractivism and Unjust Food Insecurity for Peru's Loreto Indigenous Communities

Caterina Rondoni

Environmental Sustainability and Wellbeing, Department of Humanities, University of Ferrara, 44121 Ferrara, Italy; caterina.rondoni@unife.it

**Abstract: Background.** Many scholars have examined Indigenous food security and sovereignty yet the topic still represents a small share of environmental justice scholarship. Therefore, we completed a case study of the environmental justice challenges concerning food security faced by the Indigenous communities of Peru's Loreto region. **Methods.** During 2019, we conducted fieldwork in 64 Indigenous communities of Kukama Kukamiria and Urarina in the Amazon rainforests of Loreto, Peru. Based on a semi-stratified sample and snowball sampling method, we combined participant observation with 139 interviews focused on feeding habits, production and availability, access, utilization, food stability, and perception of food insecurity with the Food Insecurity Experience Scale (FIES) method. **Results.** Analyzing these themes led to worrisome assessments of the food insecurity and institutional limits of Indigenous communities. Because of their geographic location, these communities experience a degraded and unhealthy environment with water and food contaminated by hydrocarbon extraction activity. Furthermore, Peru's policy of food and nutrition security has public management deficiencies especially in the Loreto region. Thus, many of the efforts adopted remain ineffective. **Conclusion.** Indigenous communities that live following ancestral culture often lack resources to change their diets. Thus, they frequently suffer the most following the contamination of an environment with which they experience an interdependent relation.

**Keywords:** food security; food insecurity; environmental justice; Indigenous communities; oil pollution; Latin America

**Citation:** Rondoni, C. Extractivism and Unjust Food Insecurity for Peru's Loreto Indigenous Communities. *Sustainability* **2022**, *14*, 6954. <https://doi.org/10.3390/su14126954>

Academic Editors: Troy D. Abel, Debra J. Salazar, Patrick D. Murphy and White, MS

Received: 13 November 2021

Accepted: 26 May 2022

Published: 7 June 2022

**Publisher's Note:** MDPI stays neutral with regard to jurisdictional claims in published maps and institutional affiliations.

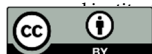

**Copyright:** © 2022 by the authors. Submitted for possible open access publication under the terms and conditions of the Creative Commons Attribution (CC BY) license (<https://creativecommons.org/licenses/by/4.0/>).

## Supplementary materials

## Section SA – Main Social Indicators

Source: INEI, Loreto. Compendio Estadístico 2017. Available online: [https://www.inei.gob.pe/media/MenuRecursivo/publicaciones\\_digitales/Est/Lib1501/libro.pdf](https://www.inei.gob.pe/media/MenuRecursivo/publicaciones_digitales/Est/Lib1501/libro.pdf)

**Table S1** Population census 2017 by urban and rural area (national and regional comparison).

|               | Total population |     | Urban      |      | Rural     |      |
|---------------|------------------|-----|------------|------|-----------|------|
|               | Number           | %   | Number     | %    | Number    | %    |
| National      | 29 381 884       | 100 | 23 311 893 | 79.3 | 6 069 991 | 20.7 |
| Loreto Region | 883 510          | 100 | 606 743    | 68.7 | 276 767   | 31.3 |

**Table S2:** Census 2017 population (%) aged 3 and over by urban and rural area according to ethnic self-identification (national and regional comparison).

|                                                                    | Total |        | Urbana |        | Rural |        |
|--------------------------------------------------------------------|-------|--------|--------|--------|-------|--------|
|                                                                    | Peru  | Loreto | Peru   | Loreto | Peru  | Loreto |
| Quechua                                                            | 22.3  | 1.4    | 18.9   | 1.5    | 36.1  | 1.3    |
| Aimara                                                             | 2.4   | 0.1    | 1.8    | 0.1    | 4.6   | 0.0    |
| Nativo o indígena de la amazonia                                   | 0.9   | 8.3    | 0.3    | 2.0    | 3.4   | 24.3   |
| Perteneciente o parte de otro pueblo indígena o originario         | 0.2   | 1.5    | 0.1    | 0.2    | 0.6   | 4.9    |
| Negro, moreno zambo, mulato/ pueblo afroperuano o afrodescendiente | 3.6   | 2.7    | 3.7    | 3.0    | 3.1   | 2.0    |
| Blanco                                                             | 5.9   | 1.9    | 6.3    | 2.3    | 4.1   | 0.9    |
| Mestizo                                                            | 60.2  | 75.9   | 63.9   | 81.5   | 45.1  | 61.6   |
| Otro                                                               | 1.2   | 0.4    | 1.4    | 0.5    | 0.4   | 0.1    |
| No sabe/ No responde                                               | 3.3   | 7.8    | 3.5    | 8.9    | 2.6   | 2.9    |

**Table S3:** Native communities in the total 2017 census and in the Loreto region according to ethnic self-identification.

| Indigenous or native people | Total Native Communities surveyed | Native communities registered in the Loreto department | %      |
|-----------------------------|-----------------------------------|--------------------------------------------------------|--------|
| Ashaninka                   | 520                               | 3                                                      | 0.57   |
| Awajún                      | 419                               | 60                                                     | 14.31  |
| Kichwa                      | 315                               | 215                                                    | 68.25  |
| Kukama Kukamiria            | 216                               | 216                                                    | 100.00 |
| Shawi                       | 185                               | 175                                                    | 94.59  |
| Shipibo-Konibo              | 153                               | 45                                                     | 29.41  |
| Asheninka                   | 113                               | 1                                                      | 0.88   |

|               |             |             |              |
|---------------|-------------|-------------|--------------|
| Achuar        | 94          | 94          | 100.00       |
| Yagua         | 86          | 86          | 100.00       |
| Matsigenka    | 69          | -           | -            |
| Yanesha       | 65          | -           | -            |
| Wampis        | 65          | 19          | 29.23        |
| Urarina       | 65          | 65          | 100.00       |
| Kandozi       | 54          | 54          | 100.00       |
| Tikuna        | 38          | 38          | 100.00       |
| Yine          | 30          | 1           | 3.33         |
| Nomatsigenga  | 24          | -           | -            |
| Murui-Muinani | 24          | 24          | 100.00       |
| Matsés        | 19          | 19          | 100.00       |
| Harakbut      | 17          | -           | -            |
| Cashinahua    | 16          | 1           | 6.15         |
| Kakataibo     | 14          | -           | -            |
| Bora          | 14          | 14          | 100.00       |
| Mastanahua    | 13          | -           | -            |
| Kapanawa      | 12          | 12          | 100.00       |
| Yaminahua     | 8           | -           | -            |
| Secoya        | 7           | 7           | 100.00       |
| Madija        | 7           | -           | -            |
| Sharanahua    | 6           | -           | -            |
| Shiwilu       | 5           | 5           | 100.00       |
| Maijuna       | 5           | 5           | 100.00       |
| Ikitu         | 4           | 4           | 100.00       |
| Amahuaca      | 4           | -           | -            |
| Ese eja       | 3           | -           | -            |
| Ocaina        | 2           | 2           | 100.00       |
| Nahua         | 2           | -           | -            |
| Kakinte       | 2           | -           | -            |
| Arabela       | 2           | 2           | 100.00       |
| Resígaro      | 1           | 1           | 100.00       |
| Quechuas      | 1           | -           | -            |
| Marinahua     | 1           | -           | -            |
| Jíbaro        | 1           | 1           | 100.00       |
| Chapra        | 1           | 1           | 100.00       |
| Chamicuro     | 1           | 1           | 100.00       |
| <b>Total</b>  | <b>2703</b> | <b>1171</b> | <b>43.32</b> |

**Table S4:** Census 2017 population (%) aged 3 and over by urban and rural area according to educational level attained (national and regional comparison).

|                                        | Total |        | Urban |        | Rural |        |
|----------------------------------------|-------|--------|-------|--------|-------|--------|
|                                        | Peru  | Loreto | Peru  | Loreto | Peru  | Loreto |
| <b>Without Education</b>               | 5.0   | 4.5    | 2.6   | 2.2    | 15.2  | 10.7   |
| <b>Initial</b>                         | 0.2   | 0.2    | 0.2   | 0.2    | 0.3   | 0.2    |
| <b>Primary</b>                         | 19.5  | 29.3   | 14.6  | 21.9   | 38.9  | 49.0   |
| <b>Secondary</b>                       | 41.3  | 43.4   | 42.4  | 46.6   | 36.4  | 35.0   |
| <b>High school</b>                     | 34.0  | 22.6   | 39.9  | 29.1   | 9.3   | 5.1    |
| - After School<br>No<br>Universitarian | 14.3  | 10.4   | 16.5  | 13.2   | 5.2   | 2.9    |
| - Universitarian                       | 19.7  | 12.2   | 23.4  | 15.9   | 4.0   | 2.2    |

**Table S5:** Census 2017 population (%) aged 3 and over by sex and urban and rural area according to educational level attained (national and regional comparison).

|                                                      | Male  |        |       |        | Female |        |       |        |
|------------------------------------------------------|-------|--------|-------|--------|--------|--------|-------|--------|
|                                                      | Urban |        | Rural |        | Urban  |        | Rural |        |
|                                                      | Peru  | Loreto | Peru  | Loreto | Peru   | Loreto | Peru  | Loreto |
| <b>Without Education</b>                             | 3.29  | 3.99   | 9.29  | 9.03   | 5.17   | 4.99   | 19.88 | 14.40  |
| <b>Initial</b>                                       | 5.39  | 6.65   | 5.56  | 7.95   | 5.02   | 6.29   | 5.63  | 8.41   |
| <b>Primary</b>                                       | 20.62 | 28.78  | 42.84 | 51.13  | 23.34  | 32.50  | 42.99 | 54.26  |
| <b>Secondary</b>                                     | 39.41 | 38.33  | 34.59 | 27.88  | 34.57  | 36.59  | 25.78 | 20.81  |
| <b>Basic special (Básica especial)</b>               | 0.17  | 0.15   | 0.03  | 0.01   | 0.23   | 0.19   | 0.03  | 0.02   |
| <b>Superior No<br/>Universitarian<br/>Incomplete</b> | 4.76  | 3.74   | 1.76  | 0.96   | 4.86   | 3.38   | 1.42  | 0.55   |
| <b>Sup. No<br/>Universitarian<br/>Complete</b>       | 7.68  | 6.36   | 2.59  | 1.32   | 8.59   | 5.33   | 1.77  | 0.57   |
| <b>Sup. Universitarian<br/>Incompleta</b>            | 6.34  | 3.04   | 1.08  | 0.37   | 6.23   | 3.29   | 1.01  | 0.29   |
| <b>Sup. Universitaria<br/>Complete</b>               | 10.68 | 8.15   | 2.16  | 1.26   | 10.61  | 6.76   | 1.36  | 0.6    |
| <b>Maester/ Ph.D.</b>                                | 1.61  | 0.77   | 0.16  | 0.06   | 1.35   | 0.63   | 0.09  | 0.06   |

**Table S6:** Population in the 2014 census at the national and regional level according to health variables

|                                                                                                          | Peru   | Loreto |
|----------------------------------------------------------------------------------------------------------|--------|--------|
| <b>Health insurance (%)</b>                                                                              |        |        |
| Population affiliated with some health insurance                                                         | 69.0   | 79.5   |
| Only Peruvian Health Insurance Partner (ESSALUD)                                                         | 24.6   | 15.0   |
| Only Comprehensive Health Insurance (SIS)                                                                | 39.0   | 60.8   |
| Others                                                                                                   | 5.4    | 3.7    |
| <b>Population that reported suffering from a chronic health problem (%)</b>                              | 35.7   | 29.5   |
| Male                                                                                                     | 30.9   | 28.3   |
| Female                                                                                                   | 40.5   | 30.6   |
| <b>Population that reported suffering from a non-chronic health problem (%)</b>                          | 31.9   | 35.5   |
| Male                                                                                                     | 32.4   | 33.1   |
| Female                                                                                                   | 31.4   | 37.9   |
| <b>Reported cases of tuberculosis</b>                                                                    | 23 296 | 1 134  |
| <b>Reported Cases of Acquired Immune Deficiency Syndrome (AIDS)</b>                                      | 1 254  | 115    |
| <b>Women using a family planning method (%)</b>                                                          | 74.6   | 62.8   |
| <b>Adolescents (15-19 years old) who are already a mother or who are pregnant for the first time (%)</b> | 14.6   | 30.4   |
| <b>Prenatal care by health professionals (%)</b>                                                         | 96.9   | 79.7   |
| <b>Births attended in health facilities (%)</b>                                                          | 89.5   | 66.6   |
| <b>Births attended by health professionals (%)</b>                                                       | 90.0   | 61.6   |
| <b>Proportion of children under 36 months with complete basic vaccines for their age (%)</b>             | 61.1   | 50     |

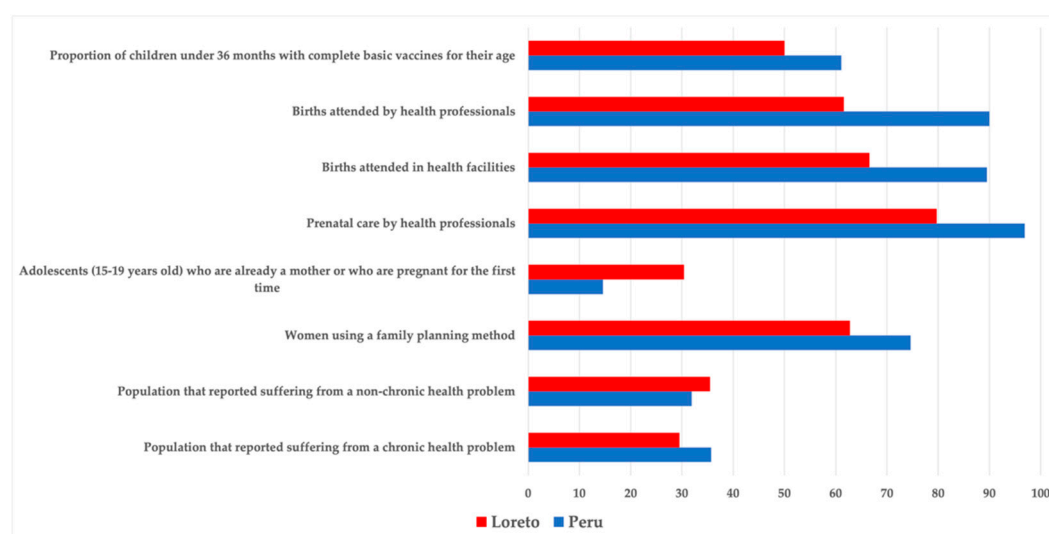**Figure S1** Population (%) in the 2014 census at the national and regional level according to health variables, national and regional comparison (source: own elaboration from the data of the INEI, Loreto. Compendio Estadístico 2017).

**Table S7:** Population in the 2014 census at national and regional level according to employment variables

| Employee Type                                                        | Peru     | Loreto |
|----------------------------------------------------------------------|----------|--------|
| <b>Working Age Population (Thousands of people)</b>                  | 22 668.6 | 697.1  |
| Economically active population                                       | 16 396.4 | 506.4  |
| Economically Inactive Population                                     | 6 272.2  | 190.7  |
| Occupancy rate (%)                                                   | 96.3     | 97.5   |
| Unemployment rate (%)                                                | 3.7      | 2.5    |
| <b>Economically Active Employed Population (Thousands of people)</b> | 15 796.9 | 493.5  |
| Male occupation rate (%)                                             | 56.22    | 61.1   |
| Female occupation rate (%)                                           | 43.78    | 38.9   |
| <b>Economically Active Population Employed by employment (%)</b>     |          |        |
| Formal                                                               | 27.2     | 18.1   |
| Informal                                                             | 72.8     | 81.9   |
| <b>Average monthly income from work (Nuevos soles)</b>               | 1229.9   | 1038.0 |

**Section SB – Main Economic Indicators**

Source: INEI, Loreto. Compendio Estadístico 2017. Available online:

[https://www.inei.gob.pe/media/MenuRecursivo/publicaciones\\_digitales/Est/Lib1501/libro.pdf](https://www.inei.gob.pe/media/MenuRecursivo/publicaciones_digitales/Est/Lib1501/libro.pdf)

**Tabla S8:** Gross Value Added 2018, Values at Constant Prices 2007 (thousands of soles)

| Activities                                   | Gross Value Added |           | Structure (%) |        |
|----------------------------------------------|-------------------|-----------|---------------|--------|
|                                              | Peru              | Loreto    | Peru          | Loreto |
| Agriculture, livestock, hunting and forestry | 28 495 000        | 764 000   | 5.3           | 8.6    |
| Fishing and aquaculture                      | 2 355 000         | 35 810    | 0.4           | 0.4    |
| Oil, gas, mineral extraction and services    | 66 463 932        | 1 618 263 | 12.4          | 18.3   |
| Manufacturing                                | 71 038 866        | 634 275   | 13.3          | 7.2    |
| Electricity, gas and water                   | 9 845 000         | 109 016   | 1.8           | 1.2    |
| Construction                                 | 31 666 000        | 323 277   | 5.9           | 3.6    |
| Commerce                                     | 55 659 000        | 1 514 254 | 10.4          | 17.1   |
| Transportation, storage, mail, courier       | 29 903 000        | 475 321   | 5.6           | 5.4    |
| Accommodation and restaurants                | 16 789 000        | 289 727   | 3.1           | 3.3    |

|                                                   |             |           |       |       |
|---------------------------------------------------|-------------|-----------|-------|-------|
| Telecommunications and other information services | 23 808 000  | 312 123   | 4.5   | 3.5   |
| Public administration and defense                 | 27 152 000  | 723 295   | 5.1   | 8.2   |
| Other services                                    | 123 103 000 | 2 066 040 | 23    | 23.3  |
| Gross value Added                                 | 486 277 798 | 8 865 351 | 90.9  | 100.0 |
| Production Tax                                    | 44 337 341  |           | 8.3   |       |
| Import Right                                      | 4 080 055   |           | 0.8   |       |
| Gross Domestic Product                            | 534 695 194 |           | 100.0 |       |

**Table S9:** Census population 2017 (%) at national and regional level according to work activity

| Activities                                                                                                                        | Peru  | Loreto |
|-----------------------------------------------------------------------------------------------------------------------------------|-------|--------|
| Agriculture, forestry and fishing                                                                                                 | 19.13 | 32.95  |
| Mining and quarrying                                                                                                              | 1.05  | 0.18   |
| Manufacturing industries                                                                                                          | 8.0   | 4.78   |
| Supply of electricity, gas, steam and air conditioning                                                                            | 0.11  | 0.08   |
| Water supply, sewage disposal, waste management and decontamination                                                               | 0.27  | 0.16   |
| Construction                                                                                                                      | 7.07  | 5.57   |
| Wholesale and Retail, repair of motor vehicles and motorcycles                                                                    | 19.53 | 18.30  |
| Transport and storage                                                                                                             | 8.79  | 7.45   |
| Accommodation and meal service activities                                                                                         | 5.89  | 5.98   |
| Information and communications                                                                                                    | 1.08  | 0.40   |
| Financial and insurance activities                                                                                                | 1.06  | 0.53   |
| Real estate activities                                                                                                            | 0.19  | 0.06   |
| Professional, scientific and technical activities                                                                                 | 6.28  | 4.18   |
| Administrative and support service activities                                                                                     | 3.50  | 2.20   |
| Public administration and defense                                                                                                 | 3.67  | 3.47   |
| Teaching                                                                                                                          | 5.93  | 6.58   |
| Human health care and social assistance activities                                                                                | 3.01  | 2.17   |
| Artistic, entertainment and recreational activities                                                                               | 0.96  | 0.50   |
| Other service activities                                                                                                          | 2.88  | 3.19   |
| Household activities as employers, undifferentiated activities of households as producers of goods and services for their own use | 1.57  | 1.27   |
| Activities of extraterritorial organizations and bodies                                                                           | 0.01  | 0.00   |

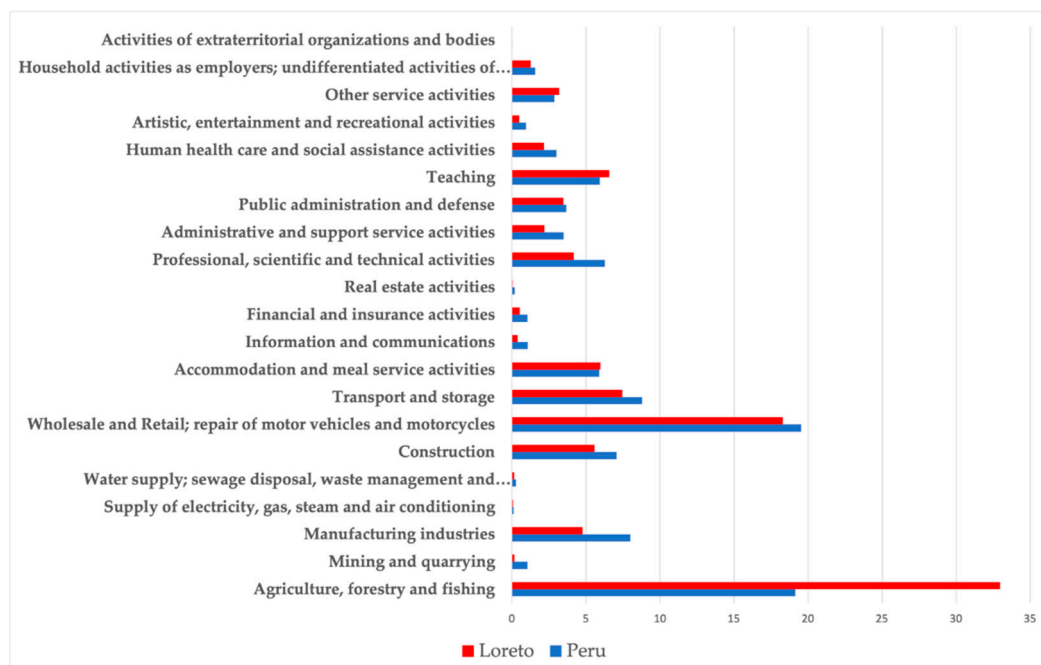

**Figure S2** Census population 2017 (%) at national and regional level according to work activity (source: own elaboration from the data of the INEI, Loreto. Compendio Estadístico 2017).

**Section SC – Kukama-Kukamiria native communities surveyed in 2017 according to socio-economic characteristics.** Source: INEI, Censos Nacionales 2017: XII de Población, VII de Vivienda y III de Comunidades Indígenas. Available online: [https://www.inei.gob.pe/media/MenuRecursivo/publicaciones\\_digitales/Est/Lib1539/libro.pdf](https://www.inei.gob.pe/media/MenuRecursivo/publicaciones_digitales/Est/Lib1539/libro.pdf)

| Characteristics of native communities Kukama-Kukamiria | N. community | %    |
|--------------------------------------------------------|--------------|------|
| Total native communities                               | 216          | 7.9  |
| Affiliation to any federation or organization          | 159          | 73.6 |
| Recognized Communities                                 | 208          | 96.3 |
| Native communities with property title                 | 134          | 64.4 |
| Native communities with conflicts                      | 46           | 21.3 |
| - Community member                                     | 5            | 10.9 |
| - Other native and / or peasant communities            | 32           | 69.6 |
| - Private persons                                      | 7            | 15.2 |
| - Oil companies                                        | 3            | 6.5  |
| - Timber companies                                     | 3            | 6.5  |
| - Mining companies                                     | 1            | 2.7  |
| - Informal Miners                                      | -            | -    |
| Native communities with communication service          | 132          | 61.1 |
| Native communities with communal use infrastructures   | 141          | 65.3 |



|                                                                                                |     |      |
|------------------------------------------------------------------------------------------------|-----|------|
| Native communities by means of communication to get from the district capital to the community |     |      |
| - River / lake route                                                                           | 206 | 95.4 |
| - Horseshoe / trail                                                                            | 16  | 7.4  |
| - Carriage way                                                                                 | 7   | 3.2  |
| - Affirmed road                                                                                | 10  | 4.6  |
| - Paved road                                                                                   | 1   | 0.5  |
| - Airway                                                                                       | -   | -    |
| Native communities registered by social programs that benefit the community                    |     |      |
| - Food Supplementation Program (PANTBC)                                                        | 6   | 2.7  |
| - Qali Warma Program                                                                           | 209 | 96.7 |
| - Educational materials                                                                        | 127 | 58.8 |
| - Beca 18 Program                                                                              | 37  | 17.1 |
| - CUNA MÁS Program                                                                             | 64  | 29.6 |
| - Pensión 65 Program                                                                           | 189 | 87.5 |
| - Comprehensive Health Insurance (SIS)                                                         | 216 | 100  |
| - Diarrheal Disease Control Program                                                            | 53  | 24.5 |
| - JUNTOS Program                                                                               | 196 | 90.7 |
| - TAMBOS Program                                                                               | 7   | 3.2  |
| - Literacy Program                                                                             | 12  | 5.5  |
| - Vaccine Program (immunizations)                                                              | 86  | 39.8 |
| - Sembrando Program (improved kitchen)                                                         | 30  | 13.9 |

**Section SD – Urarina native communities surveyed in 2017 according to socio-economic characteristics.**

**Source:** INEI, Censos Nacionales 2017: XII de Población, VII de Vivienda y III de Comunidades Indígenas. Available online: [https://www.inei.gob.pe/media/MenuRecursivo/publicaciones\\_digitales/Est/Lib1539/libro.pdf](https://www.inei.gob.pe/media/MenuRecursivo/publicaciones_digitales/Est/Lib1539/libro.pdf)

| Characteristics of native communities Kukama-Kukamiria | N. comunidad | %    |
|--------------------------------------------------------|--------------|------|
| Total native communities                               | 65           |      |
| Affiliation to any federation or organization          | 63           | 96.9 |
| Recognized Communities                                 | 65           | 100  |
| Native communities with property title                 | 42           | 64.6 |
| Native communities with conflicts                      | 15           | 23.1 |
| - Community member                                     | 3            | 4.6  |
| - Other native and / or peasant communities            | 9            | 13.8 |
| - Private persons                                      | 1            | 1.5  |
| - Oil companies                                        | 3            | 4.6  |
| - Timber companies                                     | 1            | 1.5  |
| - Mining companies                                     | -            | -    |

|                                                                                                |    |      |
|------------------------------------------------------------------------------------------------|----|------|
| - Informal Miners                                                                              | -  | -    |
| Native communities with communication service                                                  | 17 | 26.1 |
| Native communities with communal use infrastructures                                           | 41 | 63.1 |
| Native communities by means of communication to get from the district capital to the community |    |      |
| - River / lake route                                                                           | 62 | 95.4 |
| - Horseshoe / trail                                                                            | -  | -    |
| - Carriage way                                                                                 | -  | -    |
| - Affirmed road                                                                                | 1  | 1.5  |
| - Paved road                                                                                   | -  | -    |
| - Airway                                                                                       | -  | -    |
| Native communities registered by social programs that benefit the community                    |    |      |
| - Food Supplementation Program (PANTBC)                                                        | 2  | 3.1  |
| - Qali Warma Program                                                                           | 61 | 93.8 |
| - Educational materials                                                                        | 21 | 32.3 |
| - Beca 18 Program                                                                              | 6  | 9.2  |
| - CUNA MÁS Program                                                                             | 13 | 20   |
| - Pensión 65 Program                                                                           | 47 | 72.3 |
| - Comprehensive Health Insurance (SIS)                                                         | 63 | 96.9 |
| - Diarrheal Disease Control Program                                                            | 19 | 29.3 |
| - JUNTOS Program                                                                               | 56 | 86.1 |
| - TAMBOS Program                                                                               | 2  | 3.1  |
| - Literacy Program                                                                             | 4  | 6.1  |
| - Vaccine Program (immunizations)                                                              | 22 | 33.8 |
| - Sembrando Program (improved kitchen)                                                         | 6  | 9.2  |

## Section SE- Questionnaire on nutrition in indigenous populations

Comunidad:

Edad:

Genero:

Función en la comunidad:

Composición del hogar:

Número de niños (edades y sexo).

Número de adultos (edades y sexo)

1. Que sueles producir en la chacra?

a. Arroz    b. Yucca    c. Tomate.    d. Platano    e. Pepino.    f. Aji    g. Papaya

---

2. Has notado cambios en la producción de chacras? Si es así, ¿hace cuánto tiempo empezó a disminuir la productividad del campo (es decir, la cantidad de alimentos producidos por el campo) y comò es la production ahora?

---

---

3. Que son las plantas que se recolectan en el monte para comer?

---

---

4. Que sueles pescar?

a. Bocachico    b. Palometa    c. Zungaro    d. Carachama    e. Sardina    f. Scirus    g. liza

---

5. Has notado cambios en la cantidad de pescado y en el tamaño? ¿Se Si como era antes y como es ahora?

---

---

6. Que animales sueles criar?

a. Pollo.    b. Cerdo.    c. Carne del monte (especificar abajo)

---

7. La mayoría de la comida que consuman la producen ustedes o la compran?    a. autoconsumo    b. compra

8. Que tipo de comida compran?

---

9. Donde compran la comida que no producen?

---

10. Alguien en la familia trabaja afuera de la comunidad?

a. vende mercado    b. artesanía    c. otro

---

11. Con qué frecuencia comes a el día? a. una vez b. dos veces c. tres veces d. más

12. Cuando comes?

13. Que sueles comer?

a. pescado b. carne c. yuca d. papas e. plátanos f. arroz g. otras cosas  
(especifique abajo)

14. ¿Cuántas veces a la semana comes pescado? a. cuatro veces b. cinco veces c. más d. todos los días

¿Y cuántas veces al día? a. una vez b. dos veces d. más

15. Que agua tomas? a. agua del río b. agua embotellada. c. plante de agua d. otra

¿Tratan en cualquier manera la agua que toman? ¿Se Si como?

16. ¿Cuánta agua tomas por días (litros u otras unidades de medida, como botellas o frascos)?

17. Cuales son los ingredientes que intentan de no hacer faltar nunca en la cocina?

18. Inseguridad alimentaria

- ¿En las últimas cuatro semanas, ha estado usted preocupada porque en su familia no tenían suficiente comida? a.SI b.NO
- ¿En las últimas cuatro semanas, usted o algún miembro de su familia no ha podido comer el tipo de comida de su preferencia por falta de recursos? a.SI b.NO
- ¿En las últimas cuatro semanas, usted o algún miembro de su familia ha comido una limitada variedad de alimentos por falta de recursos? a.SI b.NO
- ¿En las últimas cuatro semanas, usted o algún miembro de su hogar ha comido menos alimentos de los que usted siente que necesitaba porque no había suficiente comida?

a.SI b.NO

- ¿En las últimas cuatro semanas, usted o algún miembro del hogar, se ha saltado alguna comida del día porque no había suficiente comida? a.SI b.NO
- ¿En las últimas cuatro semanas, usted o algún miembro de su hogar, se ha ido a dormir por la noche con hambre porque no había suficiente comida? a.SI b.NO
- ¿En las últimas cuatro semanas, usted o algún miembro de su hogar, ha pasado todo el día y noche sin comer nada porque no había suficiente comida? a.SI b.NO

19. Que actividades extrativas se desarrollan en la zona?      a. Petroleo    b. Madera    c. Minería      d. Otras.

20. Ustedes creen que el agua y el pescado estan contaminados en estas zonas? Porque? ¿Has notado algo extraño en el pescado que podría ser conectado con la contaminación?

---

---

21. Que mega proyectos se ejecutan en la zona, conoces alguno? Y que piensa sobre esto?

a. Construcción de puentes   b. Hidrovias      c. Represas.   d. Otros

22. Cree Usted que alguna de las actividades extractivas o mega proyectos afectan el agua o los alimentos que consumen?

a. Si b. No

Porque?

---

23. Te has enfermado por consumir el agua y los peces?      a. SI b. NO

¿A qué crees que se debe que tengas alguna enfermedad por consumir el agua y los peces?

---

24. Que tipo de enfermedad has tenido?

a. diarrea   b. vómitos   c. dolor de estómago   d. dolor de cabeza    e. infecciones    f. gripe                      g. fiebre  
h. bronquitis    i. hongos de la piel

---

## Section SF- In field research results

**Tabla S10** Summary of feeding habits in the ACODECOSPAT communities

| Feeding Habits                                    |                                                                                                                                                                                                             |
|---------------------------------------------------|-------------------------------------------------------------------------------------------------------------------------------------------------------------------------------------------------------------|
| How many times do they eat a day                  | <ul style="list-style-type: none"> <li>- 2 times: 74.8%</li> <li>- 3 times: 25.2%</li> </ul>                                                                                                                |
| What they usually eat                             | <ul style="list-style-type: none"> <li>- Fish: 93.5%</li> <li>- Bananas: 71.2%</li> <li>- Yucca: 56.1%</li> <li>- Rice: 54.6%</li> <li>- Meat: 32.3%</li> <li>- Corn: 7.2%</li> <li>- Potato: 5%</li> </ul> |
| Ingredient that can not be missing in the kitchen | <ul style="list-style-type: none"> <li>- Fish: 99%</li> </ul>                                                                                                                                               |
| Times a week they eat fish                        | <ul style="list-style-type: none"> <li>- Every days: 75.5%</li> <li>- 6 times: 5.7%</li> <li>- 5 times: 4.3%</li> <li>- 4 times: 7.9%</li> <li>- 3 times: 5.7%</li> </ul>                                   |
| Times a day they eat fish                         | <ul style="list-style-type: none"> <li>- 1 time: 15.9%</li> <li>- 2 times: 71.6%</li> <li>- More then 2 times: 12.5%</li> </ul>                                                                             |
| Water                                             |                                                                                                                                                                                                             |
| Water for drinking, cooking, washing              | <ul style="list-style-type: none"> <li>- river water: 88.5%</li> <li>- rain water: 5.8%</li> <li>- well water: 2.2%</li> <li>- bottled water: 0.7%</li> </ul>                                               |
| How they treat river water                        | <ul style="list-style-type: none"> <li>- chlorine: 35.9%</li> <li>- purification plant: 26.5%</li> <li>- nothig: 26.5%</li> <li>- boiling: 6.3%</li> <li>- sediments: 4.7%</li> </ul>                       |
| Vegetables and Plants                             |                                                                                                                                                                                                             |
| Main products of the farm                         | <ul style="list-style-type: none"> <li>- Yucca</li> <li>- Rice</li> <li>- Banana</li> <li>- Corn</li> <li>- Cucumber</li> <li>- Papaya</li> </ul>                                                           |
| Plantas del bosque                                | <ul style="list-style-type: none"> <li>- Aguaje</li> <li>- Chonta</li> <li>- medicinal plants</li> </ul>                                                                                                    |
| Fish and meat                                     |                                                                                                                                                                                                             |
| Main fish consumed                                | <ul style="list-style-type: none"> <li>- Boquichico</li> <li>- Palometa</li> <li>- Fasaco</li> <li>- Zungaro</li> </ul>                                                                                     |

|                    |                                                                                             |                                                                              |
|--------------------|---------------------------------------------------------------------------------------------|------------------------------------------------------------------------------|
|                    | <ul style="list-style-type: none"> <li>- Carachama</li> <li>- Sardina</li> </ul>            | <ul style="list-style-type: none"> <li>- Liza</li> </ul>                     |
| Main meat consumed | <ul style="list-style-type: none"> <li>- Chicken</li> <li>- Pork</li> <li>- Duck</li> </ul> | <ul style="list-style-type: none"> <li>- Won</li> <li>- Bush meat</li> </ul> |

**Tabla S11** Summary of the aspects related to Availability, Access, Utilization, Stability of food in ACODECOSAPT com-munites

| Availability, Access, Utilization, Stability                                                 |                                                                                                                                                                 |
|----------------------------------------------------------------------------------------------|-----------------------------------------------------------------------------------------------------------------------------------------------------------------|
| <b>Consumption typology</b>                                                                  |                                                                                                                                                                 |
| Self-consumption                                                                             | <ul style="list-style-type: none"> <li>- Vegetables and Plants</li> <li>- Fish and meat</li> </ul>                                                              |
| Products purchased                                                                           | <ul style="list-style-type: none"> <li>- Rice</li> <li>- Sugar</li> <li>- Oil</li> <li>- Salt</li> <li>- Noodles</li> <li>- Biscuits</li> <li>- Soda</li> </ul> |
| Shop place                                                                                   | <ul style="list-style-type: none"> <li>- Nauta</li> <li>- Stores in the community</li> <li>- They buy in other communities</li> <li>- Peddlers</li> </ul>       |
| <b>Family work or other forms of income</b>                                                  |                                                                                                                                                                 |
| Only internal work to the community                                                          | 48.1%                                                                                                                                                           |
| Also work outside the community (sale in the market, work by company)                        | 51.9%                                                                                                                                                           |
| <b>Perception in production change</b>                                                       |                                                                                                                                                                 |
| Change in farm production?                                                                   | Yes: 92%                                                                                                                                                        |
| Kind of change                                                                               | Decrease in production. The plants do not grow as before and are black as they would have been burned.                                                          |
| Are there changes in fishing activity?                                                       | Yes: 95%                                                                                                                                                        |
| Kind of change                                                                               | Decrease in fish availability and fish size.                                                                                                                    |
| <b>Perception of contamination</b>                                                           |                                                                                                                                                                 |
| They think the water and fish are contaminated                                               | Ye: 97.3%                                                                                                                                                       |
| They have noticed something strange in the fish that could be connected to the contamination | Yes: 35.5%                                                                                                                                                      |
| They think that extractive activity affects the water and food they consume                  | Yes: 82.7%                                                                                                                                                      |
| They think they have gotten sick from consuming the water and fish                           | Yes: 82.3%                                                                                                                                                      |
| Disease typology                                                                             | <ul style="list-style-type: none"> <li>- Diarrhea</li> <li>- Vomiting</li> <li>- Fever</li> <li>- Bronchitis</li> </ul>                                         |

|  |                                                                                                            |                                                                                          |
|--|------------------------------------------------------------------------------------------------------------|------------------------------------------------------------------------------------------|
|  | <ul style="list-style-type: none"> <li>- Stomach ache</li> <li>- Headache</li> <li>- Infections</li> </ul> | <ul style="list-style-type: none"> <li>- Skin problems</li> <li>- Parasitosis</li> </ul> |
|--|------------------------------------------------------------------------------------------------------------|------------------------------------------------------------------------------------------|

**Table S12.** Results collected with the FIER method

| Food insecurity according to the FIES method |       |
|----------------------------------------------|-------|
| Mild insecurity                              | 25.6% |
| Moderate insecurity                          | 65.9% |
| Serious insecurity                           | 8.5%  |
